# Supplementary material for: Silver nanoparticle-modified electrodes for the electrochemical detection of neonicotinoid pesticide: clothianidin
Source: Royal Society of Chemistry journal article supplement (doi:10.1039/d2ay01541b), 2022-01-01
Supplement: d2ay01541b1.pdf [file d2ay01541b1.pdf]

Supporting information

Scheme 1.

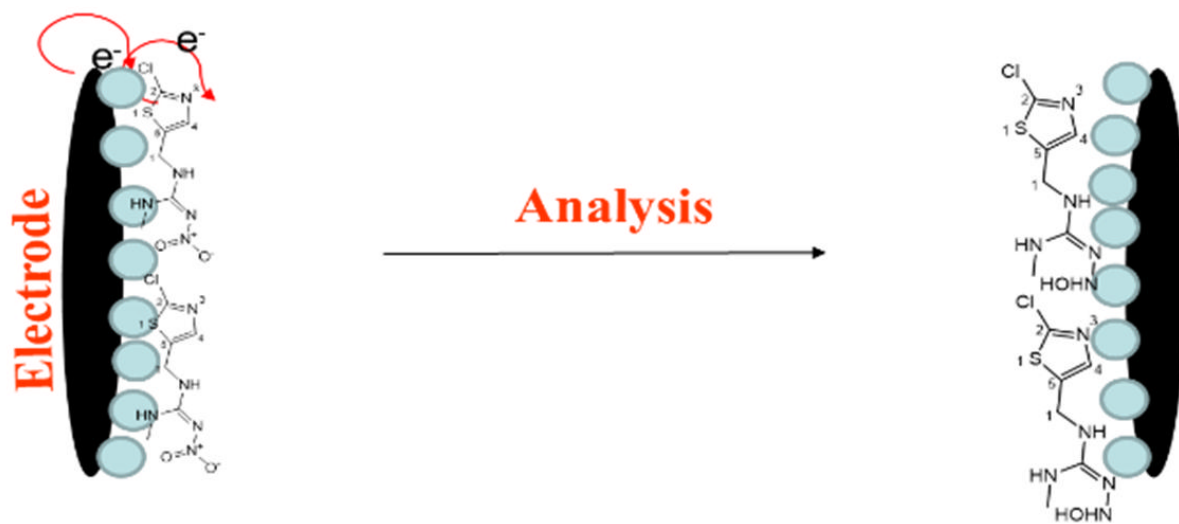

Fig. S1.

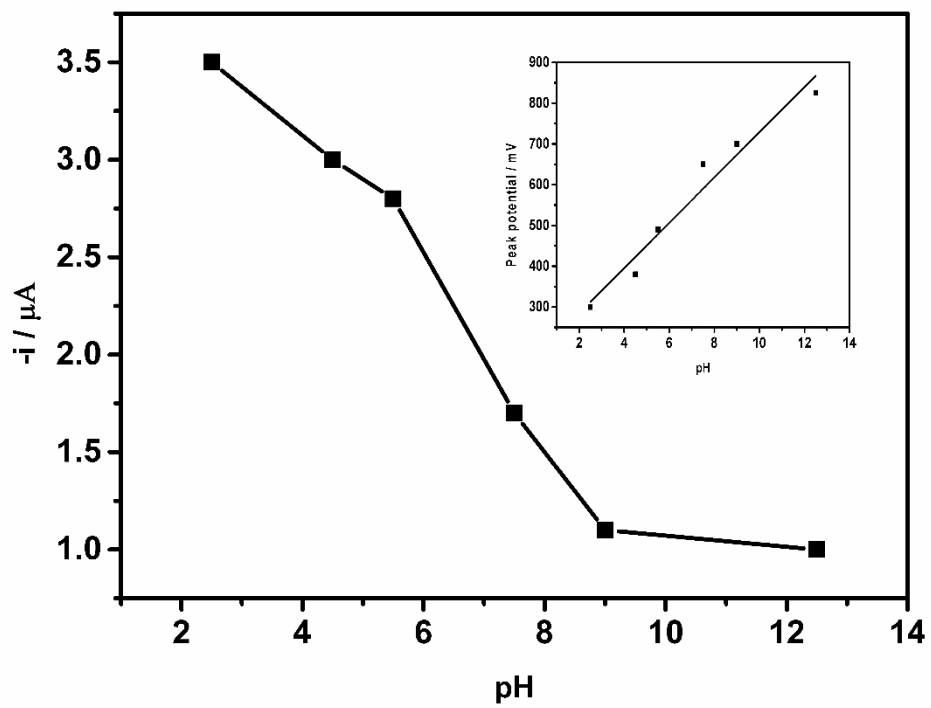

Fig. S2.

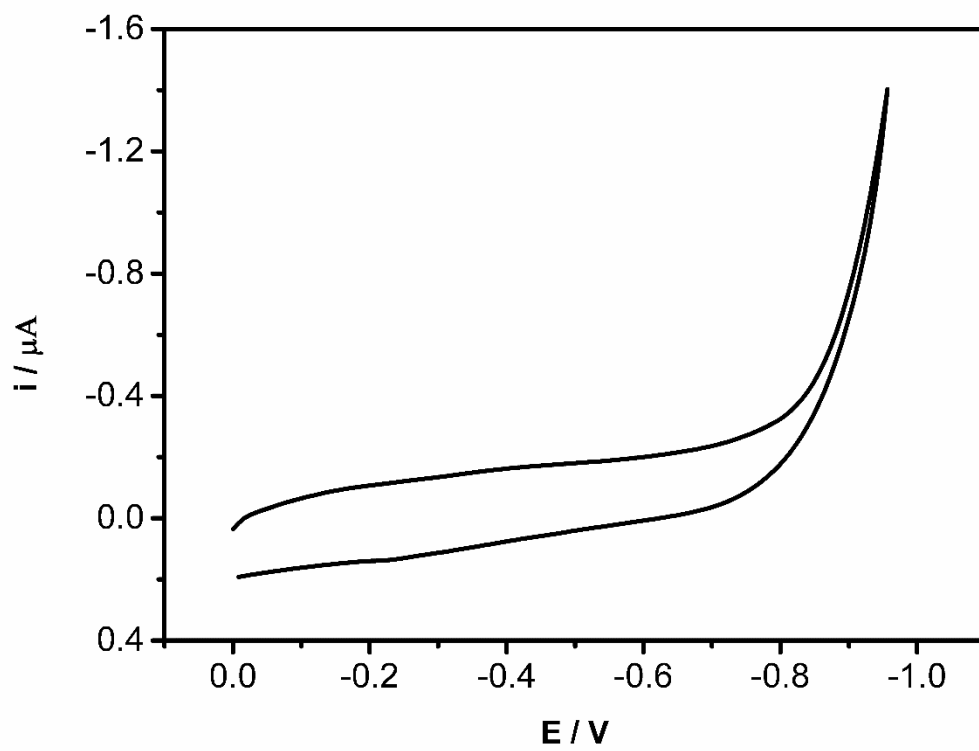

Fig.S3.

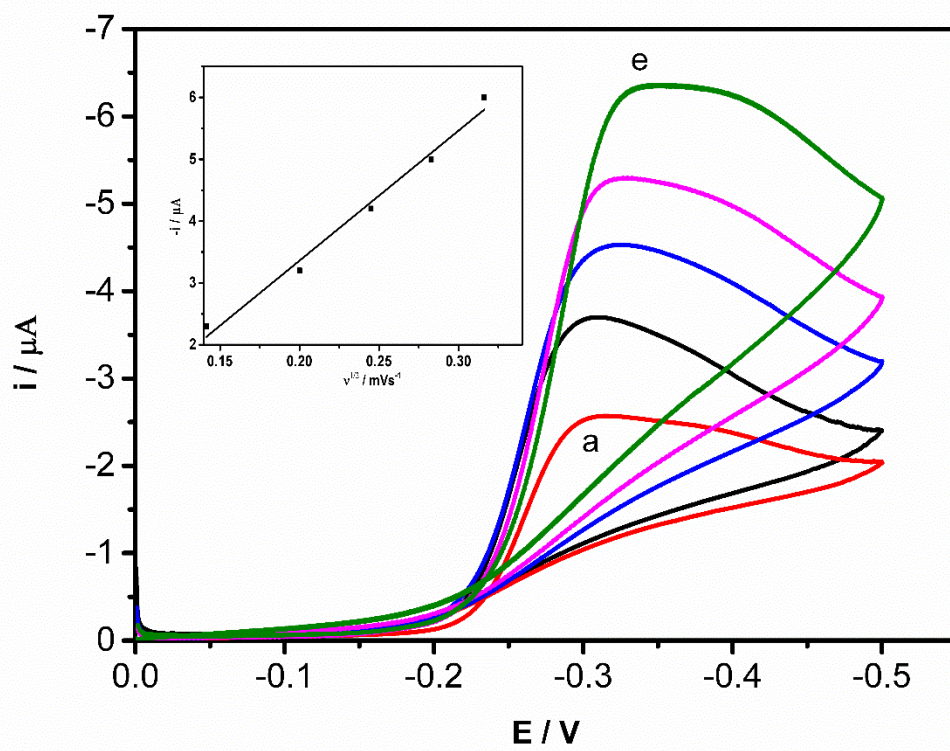

Fig.S4.

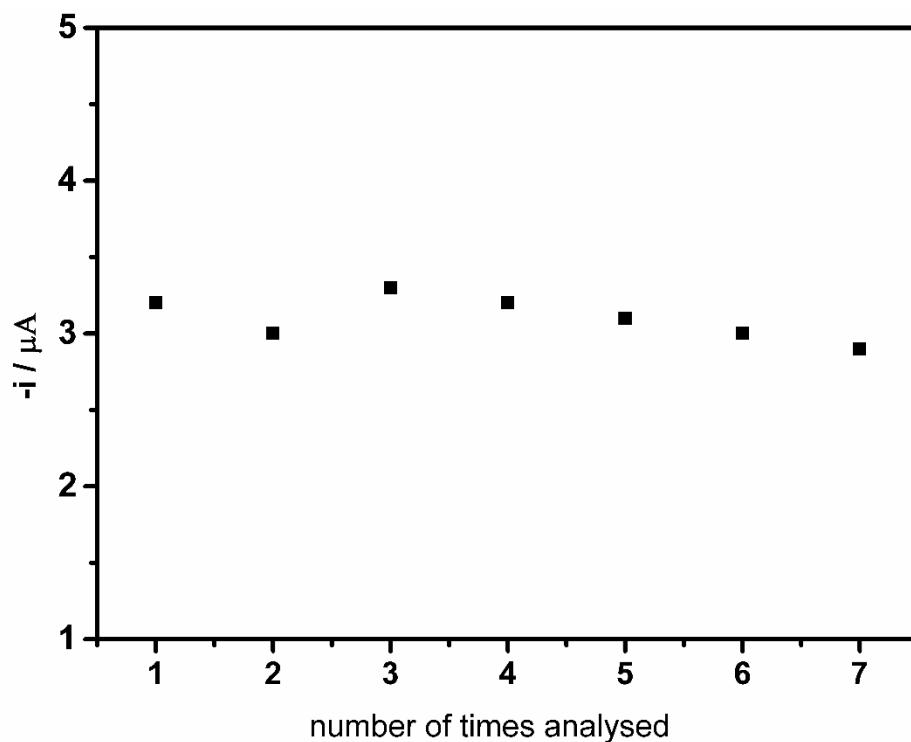

### Figure captions

**Scheme1.** Schematic representation of electrocatalytic reduction of clothianidin on AGNs modified GCE.

**Fig.S1.** pH vs. current plot for the reduction of 10  $\mu\text{M}$  clothianidin; Sweep rate: 100  $\text{mVs}^{-1}$ .  
Inset: Plot of pH vs. peak potential.

**Fig.S2.** CV response of 10  $\mu\text{M}$  clothianidin at SDS modified GCE in 2.5 pH B-R buffer solution, Sweep rate: 100  $\text{mVs}^{-1}$ .

**Fig.S3.** Effect of scan rate for the reduction of 5  $\mu\text{M}$  clothianidin at AgNs modified GCE in 2.5 pH B-R buffer solution: a) 20, b) 40, c) 60, d) 80, and e) 100  $\text{mVs}^{-1}$ ; Inset: plot of  $v^{1/2}$  vs. current.

**Fig. S4.** Reproducibility study for the reduction of 10  $\mu\text{M}$  clothianidin in 2.5 pH B-R buffer solution, Sweep rate:  $100 \text{ mVs}^{-1}$
